# Supplementary material
Source: Springer Nature journal article supplement (https://www.springermedizin.de/resource/supplementary/13014_2011_533_MOESM3_ESM.pdf/9634054)

**A**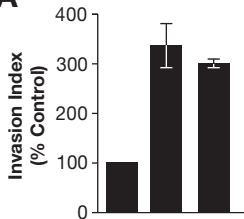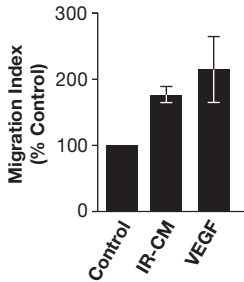**B**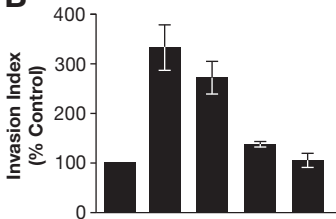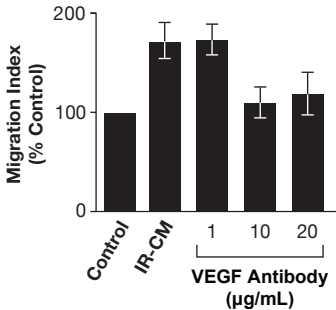

Supplement: MOESM3 [file 9634054]
